# Supplementary material
Source: publisher figshare collection journal article supplement (https://sage.figshare.com/ndownloader/files/21301332)
Supplement: Supplementary file 1 [file 21301332]

**Supplementary Table 2.** CES-D and medication adjusted differences in MRI measures in fatigue impact groups.

|                                                 | <b>Outcome</b>                | <b>BPF (%ICV)</b>              | <b>Log T2LV (mL)</b>                |
|-------------------------------------------------|-------------------------------|--------------------------------|-------------------------------------|
| <b>fatigued (SF+1F) vs non-fatigued (RF+NF)</b> | <b>β (95% CI)</b><br><b>p</b> | -0.01 (-0.02 to 0.01)<br>0.338 | 0.54 (0.04 to 1.04)<br><b>0.033</b> |
| <b>SF vs NF</b>                                 | <b>β (95% CI)</b><br><b>p</b> | -0.01 (-0.03 to 0.01)<br>0.182 | 0.85 (0.23 to 1.46)<br><b>0.008</b> |
| <b>1F vs NF</b>                                 | <b>β (95% CI)</b><br><b>p</b> | -0.01 (-0.04 to 0.01)<br>0.192 | 0.72 (-0.03 to 1.46)<br>0.061       |
| <b>RF vs NF</b>                                 | <b>β (95% CI)</b><br><b>p</b> | -0.01 (-0.03 to 0.00)<br>0.103 | 0.53 (0.02 to 1.04)<br><b>0.042</b> |
| <b>SF vs 1F</b>                                 | <b>β (95% CI)</b><br><b>p</b> | 0.00 (-0.02 to 0.03)<br>0.841  | 0.13 (-0.65 to 0.91)<br>0.741       |
| <b>SF vs RF</b>                                 | <b>β (95% CI)</b><br><b>p</b> | 0.00 (-0.02 to 0.02)<br>0.984  | 0.32 (-0.29 to 0.92)<br>0.302       |
| <b>1F vs RF</b>                                 | <b>β (95% CI)</b><br><b>p</b> | 0.00 (-0.03 to 0.02)<br>0.853  | 0.19 (-0.59 to 0.96)<br>0.634       |

The fatigue groups were compared using general linear models controlling for age, sex, disease duration, EDSS, medication, CES-D (and ICV in the analysis of log T2LV). According to the group allocation based on one MFIS assessment, the fatigued group corresponds to Sustained Fatigue (SF) and 1 time point Fatigue (1F) groups, while the Reversible (RF) and Never Fatigue (NF) groups are nested in the non-fatigued group. Abbreviations: Brain Parenchymal Fraction (BPF); Center for Epidemiologic Studies - Depression Scale (CES-D); confidence interval (CI); Expanded Disability Status Scale (EDSS); Intracranial Cavity Volume (ICV); logarithmic-transformed T2 lesion volume (log T2LV).
